# Supplementary material
Source: PubMed Central journal article supplement (PMC2814512)
Supplement: tpc.109.068700_2.pdf [file tpc.109.068700_2.pdf]

Supplemental Data. Ye et al. (2009). Arabidopsis formin3 directs the formation of actin cables and polarized growth in pollen tubes.

**Supplemental movie legend:**

**Supplemental movie 1:** This movie corresponds to the time lapse series shown in the Figure 2 (A)-(D); Timelapse of profilin/oregon-green-actin polymerization. Images were captured every 15 seconds for 15 minutes and were compressed into a 6-second QuickTime movie.

**Supplemental movie 2:** This movie corresponds to the time lapse series shown in the Figure 2 (E)-(H); Timelapse of the effect of AFH3 FH1FH2 on profilin/Oregon-green-actin polymerization. Images were captured every 15 seconds for 15 minutes and were compressed into a 4-second QuickTime movie.

**Supplemental movie 3:** This movie corresponds to the time lapse series shown in the Figure 2 (I)-(L); Timelapse of the effect of AFH3 FH2 on profilin/Oregon-green-actin polymerization. Images were captured every 15 seconds for 15 minutes and were compressed into a 6-second QuickTime movie.

**Supplemental movie 4:** This movie corresponds to the pattern of cytoplasmic streaming of wild type pollen tube as shown in Figure 7A(a); Images were taken every 0.25 s for 1 min and then compressed into an 24 s QuickTime movie.

**Supplemental movie 5:** This movie corresponds to the pattern of cytoplasmic streaming of wild type pollen tube as shown in Figure 7A(b); Images were taken every 0.25 s for 0.75 min and then compressed into an 18 sec QuickTime movie.

**Supplemental movie 6:** This movie corresponds to the pattern of cytoplasmic streaming of AFH3 RNAi pollen tube as shown in Figure 7A(c); Images were taken every 0.25 s for 1 min and then compressed into an 24 s QuickTime movie.

**Supplemental movie 7:** This movie corresponds to the pattern of cytoplasmic streaming of AFH3 RNAi pollen tube as shown in Figure 7A(d); Images were taken every 0.25 s for 1 min and then compressed into an 24 s QuickTime movie.

**Supplemental movie 8:** This movie corresponds to the pattern of cytoplasmic

streaming of AFH3 RNAi pollen tube as shown in Figure 7A(e); Images were taken every 0.25 s for 0.25 min and then compressed into an 6 s QuickTime movie.
